# Supplementary material for: The Increased Expression of Connexin and VEGF in Mouse Ovarian Tissue Vitrification by Follicle Stimulating Hormone
Source: Hindawi journal article supplement (doi:10.1155/2015/397264), 2015-01-01

## Supplemental. 1

### 1. The preparation of basic medium (1000 ml)

| Ingredients              | Quantity                             |
|--------------------------|--------------------------------------|
| DMEM                     | 5 g                                  |
| F12                      | 5.3 g                                |
| Streptomycin sulfate     | 0.1 g                                |
| Hepes                    | 2.38 g                               |
| NaHCO <sub>3</sub>       | 2.388 g                              |
| DMSO(dimethyl sulfoxide) | 10 ml                                |
| Penicillin               | 150 IU                               |
| 5.6% NaHCO <sub>3</sub>  | Adjust pH to 7.1-7.4                 |
| Triple distilled water   | Added into total volume with 1000 ml |

### 2. The preparation of cultural solution (50 ml)

12% BSA (bovine serum albumin) 5ml + basic medium 45ml

### 3. The preparation of vitrified solution

(1) Pre-equilibration solution: 1.5 mol/L (50 ml)

EG (ethylene glycol) 8.36 ml + 12% BSA 10 ml + basic medium 31.64 ml

(2) vitrified medium: 5.5 mol/L EG + 0.5 mol/L sucrose + 30% saccharosan (50 ml)

EG 15.3 ml + sucrose 8.56 g + saccharosan 15 g + 12% BSA 10 ml + basic medium 24.7 ml

### 4. Warming solution

(1) 0.5mol/L Thawing solution (50ml): sucrose 8.56 g + 12% BSA 10 ml + basic medium 40 ml

(2) 0.25mol/L Thawing solution (50ml): 0.5mol/L Thawing solution 25ml + basic medium 25ml

(3) 0.125mol/L Thawing solution (50ml): 0.25mol/L Thawing solution 25ml + basic

medium 25ml

Supplemental. 2

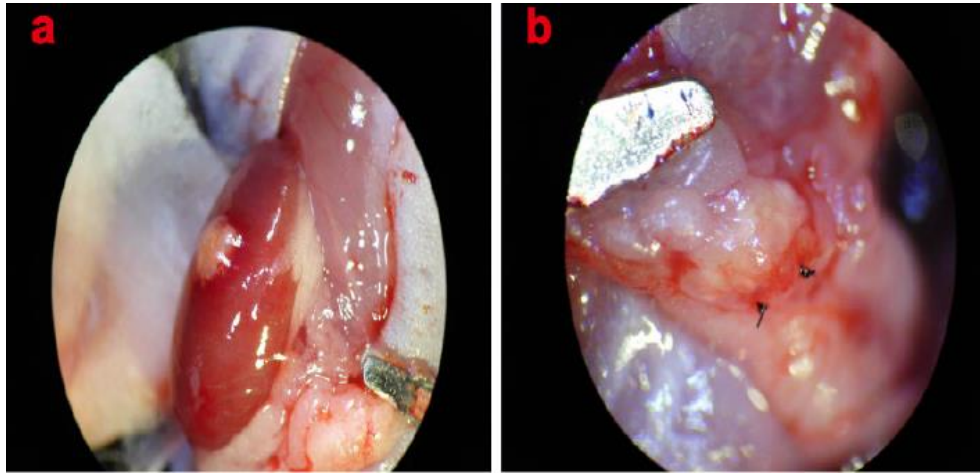

Supplemental. 3

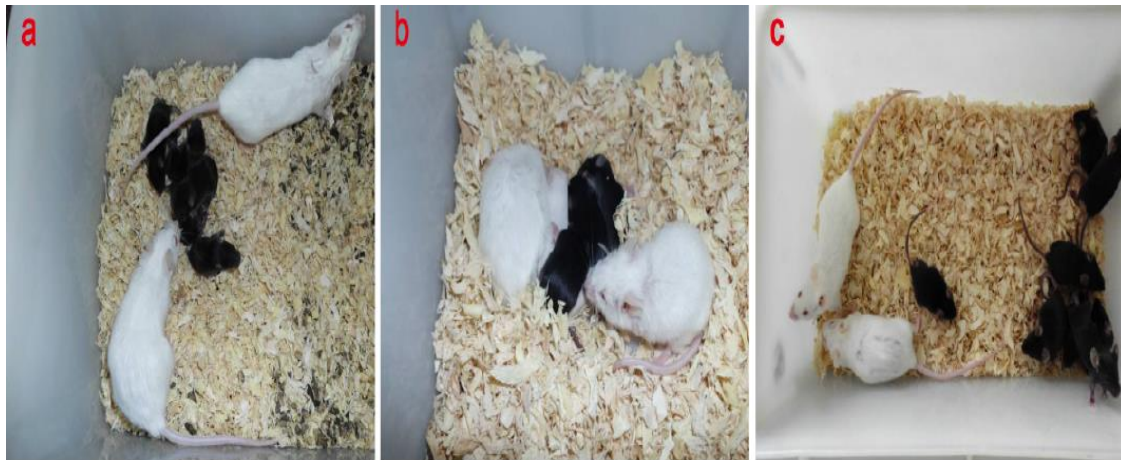

Supplement: f1 [file 397264.f1.pdf]
